# Supplementary material for: Tris(2-aminoethyl)amine based tripodal urea receptors for oxalate: encapsulation of staggered vs. planar conformers
Source: Royal Society of Chemistry journal article supplement (doi:10.1039/c3ob41071d), 2013-01-01
Supplement: c3ob41071d.pdf [file c3ob41071d.pdf]

## Supporting Information

# Tris(2-aminoethyl)amine Based Tripodal Urea Receptors for Oxalate: Capsulation of Staggered vs. Planar Conformers

5

Purnandhu Bose, Ranjan Dutta and Pradyut Ghosh\*

*Indian Association for the Cultivation of Science, 2A&2B Raja S. C. Mullick Road, Kolkata 700 032,*

*India. Fax: (+91) 33-2473-2805*

*E-mail: [icpg@iacs.res.in](mailto:icpg@iacs.res.in)*

10

15

20

25

## Table of Contents

### Experimental Section

**Figure 1S.**  $^1\text{H}$ -NMR spectrum of **L2**

**Figure 2S.**  $^{13}\text{C}$ -NMR spectrum of **L2**

5 **Figure 3S.** ESI(MS) spectrum of **L2**

**Figure 4S.**  $^1\text{H}$ -NMR spectrum of **C1**

**Figure 5S.**  $^{13}\text{C}$ -NMR spectrum of **C1**

**Figure 6S.**  $^1\text{H}$ -NMR spectrum of **C2**

**Figure 7S.**  $^{13}\text{C}$ -NMR spectrum of **C2**

10 **Figure 8S.** Scatter plot diagram for **C1**

**Figure 9S.** Packing of oxalate in the unit cell of **C2**

**Figure 10S.** Scatter plot diagram for **C2**

**Figure 11S.**  $^1\text{H}$ -NMR titration profile of **L1** with aliquots of  $\text{C}_2\text{O}_4^{2-}$  in  $\text{DMSO-}d_6/\text{D}_2\text{O}$

**Figure 12S.** Plot of chemical shift of  $-\text{CH}_c$  protons of **L1** vs equiv. of  $\text{C}_2\text{O}_4^{2-}$

15 **Figure 13S.** Job's plot of **L1** with  $\text{C}_2\text{O}_4^{2-}$

**Figure 14S.**  $^1\text{H}$ -NMR titration profile of **L2** with aliquots of  $\text{C}_2\text{O}_4^{2-}$  in  $\text{DMSO-}d_6/\text{D}_2\text{O}$

**Figure 15S.** Plot of chemical shift of  $-\text{CH}_c$  protons of **L2** vs equiv. of  $\text{C}_2\text{O}_4^{2-}$

**Figure 16S.** Job's plot of **L2** with  $\text{C}_2\text{O}_4^{2-}$

**Figure 17S.** Different peak positions of oxalate carbon in  $^{13}\text{C}$  NMR spectra

20 **Figure 18S.**  $^1\text{H}$ -NMR spectrum of **L1** in presence of 2 equivalents of NaOAc, NaOBz,  $\text{Na}_2(\text{terephthalate})$  and  $\text{K}_2\text{C}_2\text{O}_4$ .

**Figure 19S.**  $^1\text{H}$ -NMR spectrum of **L2** in presence of 2 equivalents of NaOAc, NaOBz,  $\text{Na}_2(\text{terephthalate})$  and  $\text{K}_2\text{C}_2\text{O}_4$ .

**Table 1S.** Crystallographic parameters of **C1** and **C2**

25 **Table 2S-3S.** Hydrogen bonding parameters of **C1** and **C2**

### References

## Experimental Section

### Reagents and general methods

Compounds **L1** was prepared as previously described literature procedure.<sup>1</sup> Tris-(2-aminoethyl)-amine (TREN), 3-cyanophenyl isocyanate, 3-fluorophenyl isocyanate, tetrabutylammonium iodide (TBAI) were purchased from Sigma-Aldrich and were used as received. Dichloromethane (DCM) was freshly distilled with calcium hydride. Potassium oxalate dihydrate ( $K_2C_2O_4 \cdot 2H_2O$ ), Sodium acetate (NaOAc), Sodium benzoate (NaOBz) and Sodium terephthalate [ $Na_2(C_8H_4O_4)$ ] were purchased from Merck, India and used as received. All solvents were procured from Merck, India. HRMS was recorded on a QtofMicro YA263 mass spectrometer.  $^1H$ -NMR and  $^{13}C$ -NMR spectra were recorded on 500/300 MHz and 125/75 MHz Bruker DPX-500 MHz NMR and Bruker Avance 300 Spectrometer. Elemental analyses for the synthesized receptor **L2** was carried out with Perkin-Elmer 2500 series II elemental analyzer.

### Single-crystal X-ray studies

Crystals suitable for single crystal X-ray diffraction studies were selected from the mother liquor and immersed in paratone oil and then mounted on the tip of a glass fibre and cemented using epoxy resin. Intensity data for the crystals of capsular aggregates **C1** and **C2** were collected using  $MoK_{\alpha}$  ( $\lambda = 0.7107 \text{ \AA}$ ) radiation on a Bruker SMART APEX II diffractometer equipped with CCD area detector at 100 K. The data integration and reduction were processed with SAINT<sup>2</sup> software provided with the software package of SMART APEX II. An empirical absorption correction was applied to the collected reflections with SADABS.<sup>3</sup> The structures were solved by direct methods using SHELXTL<sup>4</sup> and were refined on  $F^2$  by the full-matrix least-squares technique using the SHELXL-97<sup>5</sup> program package. Graphics were generated using PLATON<sup>6</sup> and MERCURY 2.4.<sup>7</sup> The non-hydrogen atoms were refined anisotropically till the convergence. In the case of crystals of **C1** and **C2**, all the hydrogen atoms were located from the difference Fourier map and refined isotropically.

## **<sup>1</sup>H-NMR titration studies**

All <sup>1</sup>H-NMR titration experiments for **L1** and **L2** were conducted on a Bruker 500 MHz spectrometer at 298 K respectively. Potassium oxalate dihydrate (K<sub>2</sub>C<sub>2</sub>O<sub>4</sub>·2H<sub>2</sub>O) was used to prepare the stock solution of anion in DMSO-*d*<sub>6</sub>: D<sub>2</sub>O (1:1.1) solvent system. Lower solubility of potassium oxalate in DMSO-*d*<sub>6</sub> or even in (1:1) DMSO-*d*<sub>6</sub> prevent us to maintain a similar solvent system throughout the titration. Host solution was prepared in DMSO-*d*<sub>6</sub>: D<sub>2</sub>O (9:1) solvent mixture. In a typical titration experiment, an aliquot of 8 μL of C<sub>2</sub>O<sub>4</sub><sup>2-</sup> (~40 mM) is titrated into a solution of respective host (~5 mM). Each titration experiment is repeated keeping the experimental conditions intact. To evaluate the association constants and mode of binding in case of oxalate (C<sub>2</sub>O<sub>4</sub><sup>2-</sup>) anion with **L1** and **L2**, <sup>1</sup>H-NMR titrations were performed at 298 K. Aliquots of standard solution of C<sub>2</sub>O<sub>4</sub><sup>2-</sup> was added to the solution of **L1** and **L2** in DMSO-*d*<sub>6</sub>. The association constants, log K were calculated by fitting the change in the –CH proton chemical shift with a 1:1 association model with non-linear least square analysis. Job's plot revealed a best fit for 1:1 host to guest binding mode. WINEQNMR 2.0<sup>8</sup> was used for the evaluation of binding constants. The equation  $\Delta\delta = \frac{\{([A]_0 + [L]_0 + 1/K) \pm (([A]_0 + [L]_0 + 1/K)^2 - 4[L]_0[A]_0)^{1/2}\} \Delta\delta_{\max}}{2[L]_0}$  was used for calculating association constants.

## **Synthesis of L1 and L2**

The tripodal receptors **L1** was synthesized following literature procedure and characterization data were matched with the literature data.<sup>1</sup> The synthesis of new receptor **L2** was described below. 2.28 mL (20 mmol) of 3-fluorophenyl isocyanate was dissolved in 25 mL of dry dichloromethane (DCM) at room temperature in a 100 mL 2-neck round bottomed flask equipped with a dropping funnel. Then TREN (1.0 mL, 6.5 mmol) was dissolved in 25 mL of dry DCM and was added drop-wise using a dropping funnel with constant stirring. The resulting solution was stirred for another 1 h at room temperature under nitrogen atmosphere. It was then allowed to stir overnight at ambient condition. The

white precipitate formed was filtered off and washed with DCM and diethyl ether. The collected precipitate was dried in air. Yield of **L2** is 98%.  $^1\text{H}$  NMR (500 MHz, DMSO- $d_6$ ):  $\delta$  2.593 (t, 6H,  $J = 6.5$  Hz,  $\text{NCH}_2$ ), 3.180 (d, 6H,  $J = 5.5$  Hz,  $\text{NCH}_2\text{CH}_2$ ), 6.217 (t, 3H,  $J = 5.5$  Hz,  $\text{NH}_b$ ), 6.672 (t, 3H,  $J = 7.5$  Hz, Ar-H), 7.000 (d, 3H,  $J = 9.0$  Hz, Ar-H), 7.181-7.228 (m, 3H, Ar-H), 7.428 (d, 3H,  $J = 11.5$  Hz, 5 Ar-H), 8.755 (s, 3H,  $\text{NH}_a$ );  $^{13}\text{C}$  NMR (125 MHz, DMSO- $d_6$ ):  $\delta$  38.14 ( $\text{NCH}_2$ ), 54.40 ( $\text{NCH}_2\text{CH}_2$ ), 104.97 (d, Ar-C,  $J = 43.7$  Hz), 107.89 (d, Ar-C,  $J = 35.0$  Hz), 113.99 (Ar-C), 130.68 (Ar-C), 142.99 (d, Ar-C,  $J = 18.7$  Hz), 155.70 (C=O), 161.45 (Ar-C); HRMS (+ESI) calcd for  $[\text{C}_{27}\text{H}_{30}\text{F}_3\text{N}_7\text{O}_3]$  : [**L2** +  $\text{H}^+$ ] calcd 558.2362, found 558.3456; Elemental analysis calcd: C 58.16, H 5.42, N 17.58; found: C 58.08, H 5.31, N 17.49.

## 10 Synthesis of **C1**

60 mg (0.10 mmol) of **L1** was dissolved in DMSO/ $\text{H}_2\text{O}$  (20:1 v/v) and then 74 mg (~2 equiv.) of  $n\text{-Bu}_4\text{N}^+\text{T}$  and excess  $\text{K}_2\text{C}_2\text{O}_4 \cdot 2\text{H}_2\text{O}$  was added to the above solution. Then the mixture was stirred at room temperature for 10 minutes and then heated to  $60^\circ\text{C}$ . The mixture was then filtered and allowed to evaporate for crystallization. After 3-4 days, colorless block like crystals of capsular aggregate  
15 [**(L1)** $_2(\text{C}_2\text{O}_4^{2-})(n\text{-Bu}_4\text{N}^+)_2$ ] (**C1**) suitable for single crystal X-ray diffraction analysis were obtained in 80% yield.  $^1\text{H}$  NMR (300 MHz, DMSO- $d_6$ ):  $\delta$  0.931 (t, 12H,  $\text{NCH}_2\text{CH}_2\text{CH}_2\text{CH}_3$ ,  $J = 7.35$  Hz), 1.245-1.366 (m, 8H,  $\text{NCH}_2\text{CH}_2\text{CH}_2\text{CH}_3$ ), 1.512-1.614 (m, 8H,  $\text{NCH}_2\text{CH}_2\text{CH}_2\text{CH}_3$ ), 2.494 ( $\text{NCH}_2\text{CH}_2$ , overlaps with solvent peak), 3.129-3.183 (m, 14H,  $\text{NCH}_2\text{CH}_2$  and  $\text{NCH}_2\text{CH}_2\text{CH}_2\text{CH}_3$ ), 7.194-7.306 (m, 9H,  $\text{NH}_b$  and Ar-H), 7.648 (d, 3H,  $J = 8.1$  Hz), 7.937 (s, 3H), 9.709 (s, 3H,  $\text{NH}_a$ );  $^{13}\text{C}$  NMR (75  
20 MHz, DMSO- $d_6$ ):  $\delta$  14.06 ( $\text{NCH}_2\text{CH}_2\text{CH}_2\text{CH}_3$ ), 19.81 ( $\text{NCH}_2\text{CH}_2\text{CH}_2\text{CH}_3$ ), 23.67 ( $\text{NCH}_2\text{CH}_2\text{CH}_2\text{CH}_3$ ) 37.86 ( $\text{NCH}_2$ ), 54.43 ( $\text{NCH}_2\text{CH}_2$ ), 58.17 ( $\text{NCH}_2\text{CH}_2\text{CH}_2\text{CH}_3$ ), 111.69 (CN), 119.55 (Ar-C), 120.57 (Ar-C), 122.59 (Ar-C), 124.45 (Ar-C), 129.94 (Ar-C), 142.25 (Ar-C), 155.72 (C=O), 173.58 (oxalate C=O), Elemental analysis calcd: C 65.25, H 7.69, N 17.81; found: C 65.19, H 7.64, N 17.67.

## Synthesis of C2

56 mg (0.10 mmol) of **L2** was dissolved in DMSO/H<sub>2</sub>O (20:1 v/v) and then 77 mg (~2 equiv.) of *n*-Bu<sub>4</sub>N<sup>+</sup>Γ and excess K<sub>2</sub>C<sub>2</sub>O<sub>4</sub>·2H<sub>2</sub>O was added to the above solution. Then the mixture was stirred at room temperature for 10 minutes and then heated to 60°C. The mixture was then filtered and allowed to evaporate for crystallization. After one week, colorless block like crystals of capsular aggregate [(**L2**)<sub>2</sub>(C<sub>2</sub>O<sub>4</sub><sup>2-</sup>)(*n*-Bu<sub>4</sub>N<sup>+</sup>)<sub>2</sub>] (**C2**) suitable for single crystal X-ray diffraction analysis were obtained in 75% yield. <sup>1</sup>H NMR (500 MHz, DMSO-*d*<sub>6</sub>): δ 0.914 (t, 12H, NCH<sub>2</sub>CH<sub>2</sub>CH<sub>2</sub>CH<sub>3</sub>, *J* = 7.25 Hz), 1.270-1.314 (m, 8H, NCH<sub>2</sub>CH<sub>2</sub>CH<sub>2</sub>CH<sub>3</sub>), 1.547 (8H, NCH<sub>2</sub>CH<sub>2</sub>CH<sub>2</sub>CH<sub>3</sub>), 2.464 (6H, NCH<sub>2</sub>CH<sub>2</sub>), 3.084-3.156 (m, 14H, NCH<sub>2</sub>CH<sub>2</sub> and NCH<sub>2</sub>CH<sub>2</sub>CH<sub>2</sub>CH<sub>3</sub>), 6.554 (t, 3H, *J* = 8.0 Hz, Ar-H), 6.982-7.026 (m, 10 3H, Ar-H), 7.109 (d, 3H, Ar-H), 7.245 (s, 3H, NH<sub>b</sub>), 7.483 (s, 3H, *J* = 12.5 Hz, Ar-H), 9.561 (s, 3H, NH<sub>a</sub>); <sup>13</sup>C NMR (75 MHz, DMSO-*d*<sub>6</sub>): δ 14.07 (NCH<sub>2</sub>CH<sub>2</sub>CH<sub>2</sub>CH<sub>3</sub>), 19.80 (NCH<sub>2</sub>CH<sub>2</sub>CH<sub>2</sub>CH<sub>3</sub>), 23.67 (NCH<sub>2</sub>CH<sub>2</sub>CH<sub>2</sub>CH<sub>3</sub>), 38.11 (NCH<sub>2</sub>), 55.01 (NCH<sub>2</sub>CH<sub>2</sub>), 58.16 (NCH<sub>2</sub>CH<sub>2</sub>CH<sub>2</sub>CH<sub>3</sub>), 104.92 (d, Ar-C, *J* = 26.4 Hz), 107.33 (d, Ar-C, *J* = 20.7 Hz), 114.12 (Ar-C), 130.11 (d, Ar-C, *J* = 9.9 Hz), 143.54 (d, Ar-C, *J* = 11.6 Hz), 155.99 (C=O), 161.32 (Ar-C), 173.53 (oxalate C=O), Elemental analysis calcd: C 62.61, H 7.88, N 13.28; found: C 62.57, H 7.84, N 13.27.

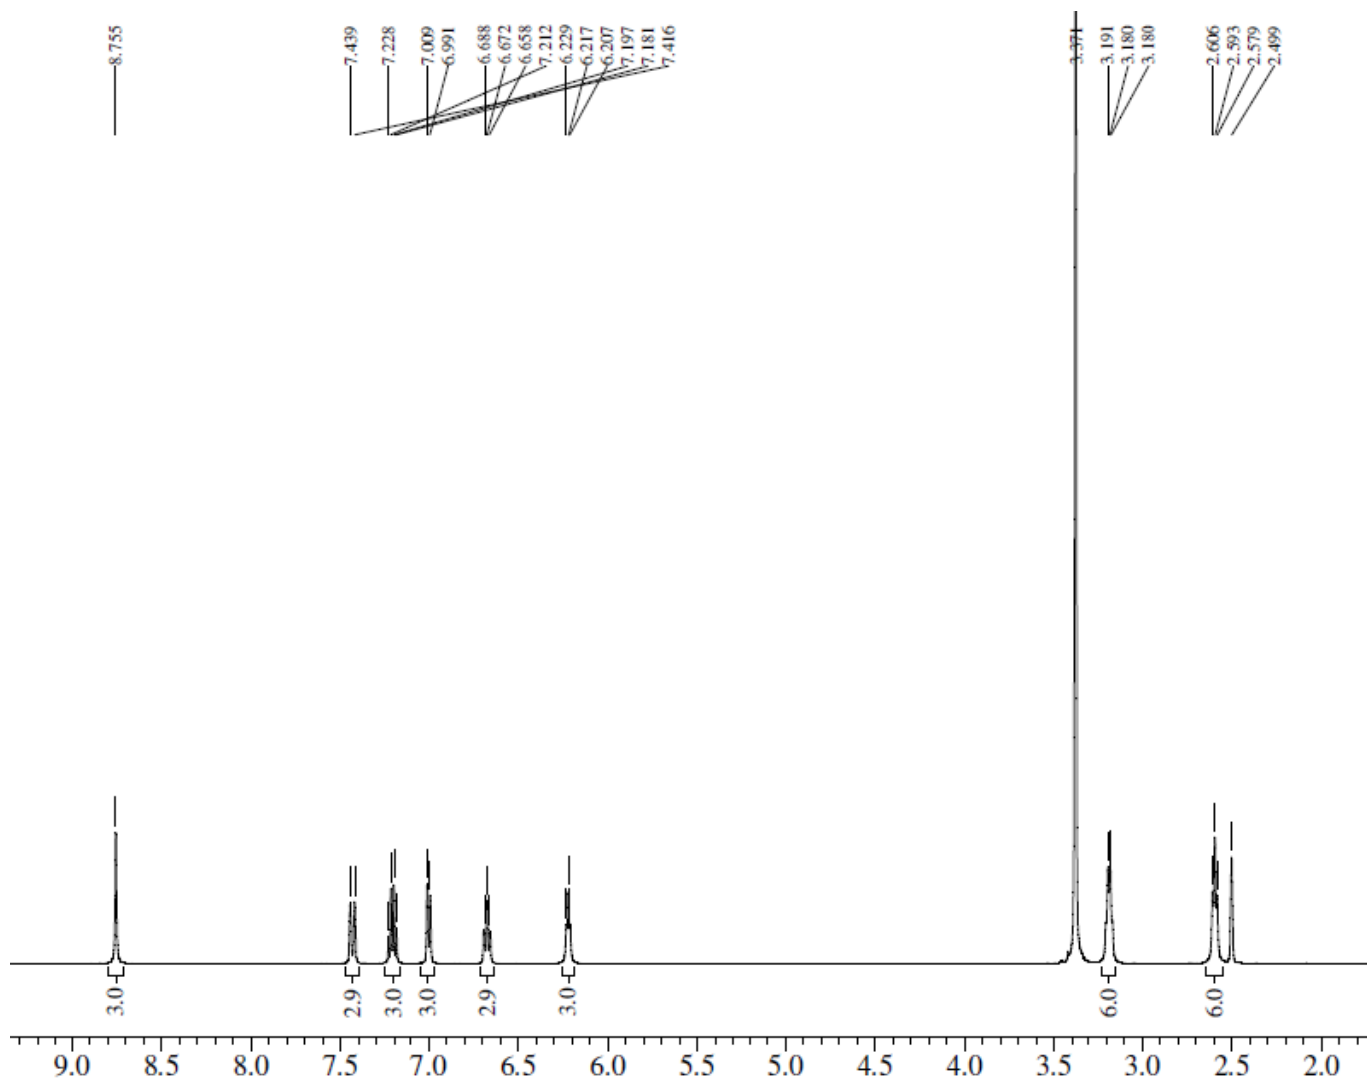

**Figure 1S.** <sup>1</sup>H-NMR spectra of L2 in DMSO-*d*<sub>6</sub> at 298K.

5

10

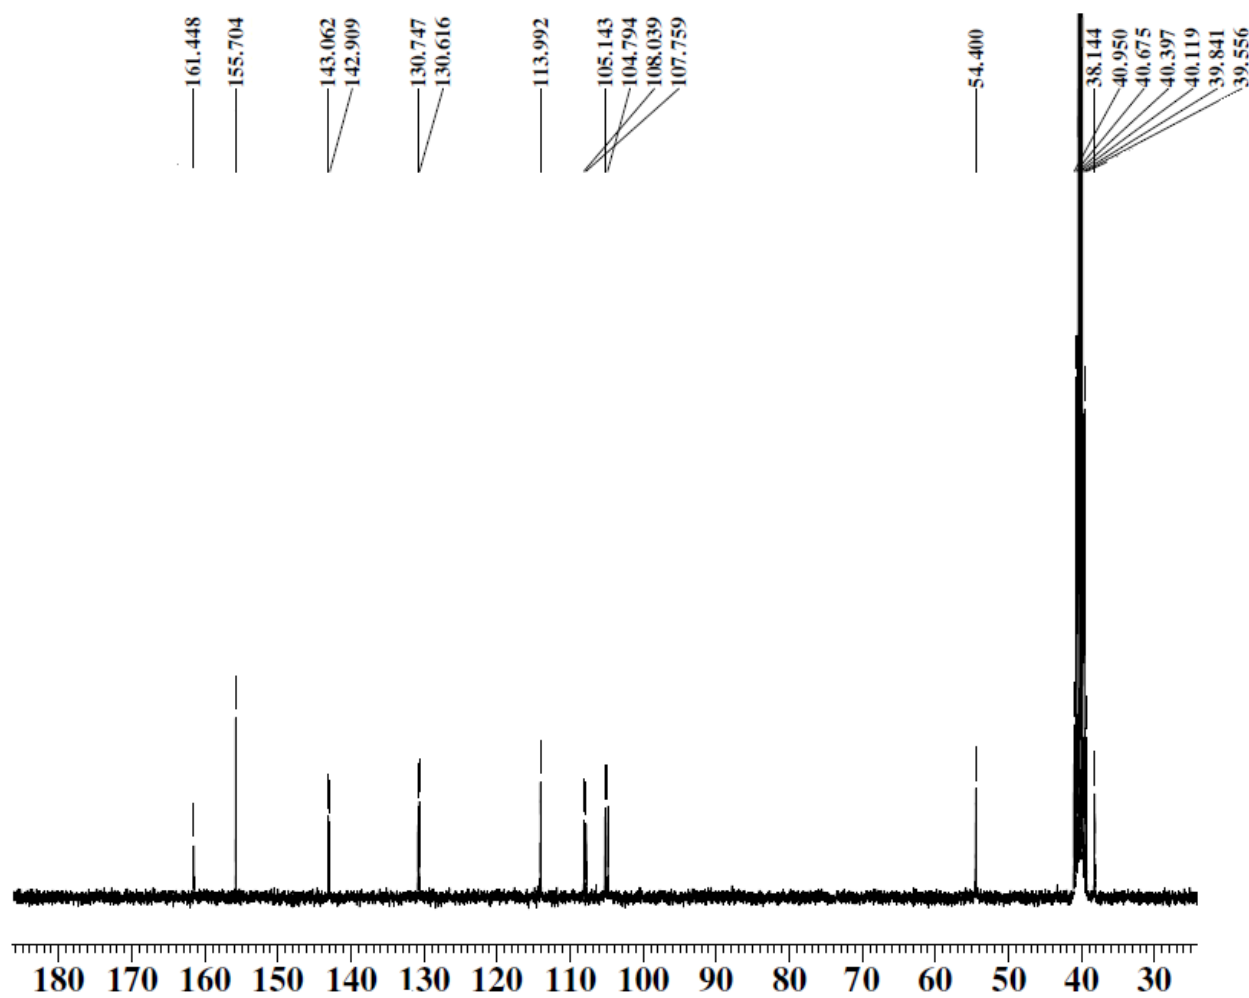

Figure 2S.  $^{13}\text{C}$ -NMR spectra of L2 in  $\text{DMSO-}d_6$  at 298K.

5

10



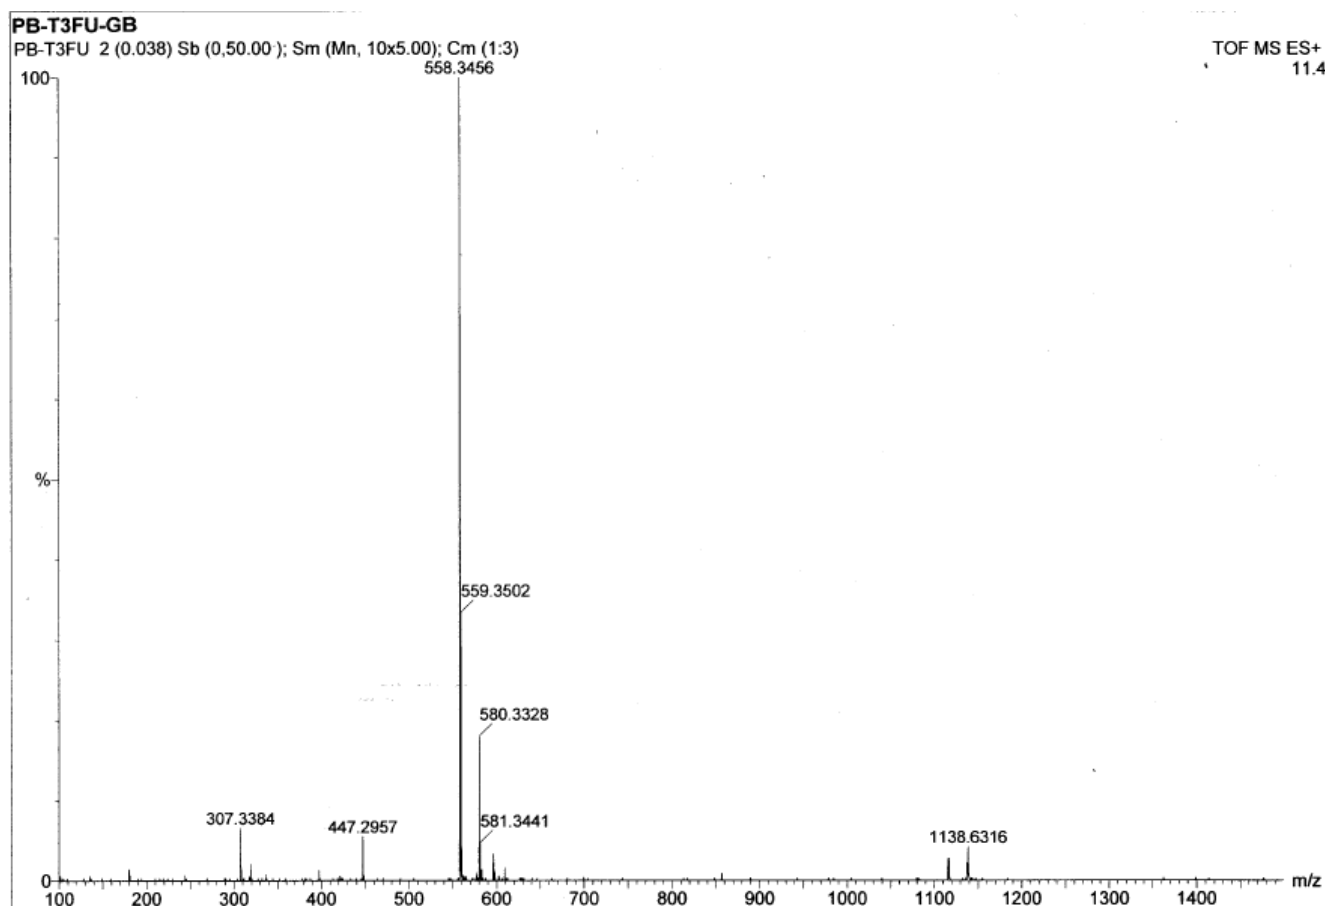

**Figure 3S.** (+ve) HRMS spectra of **L2**.

5

10

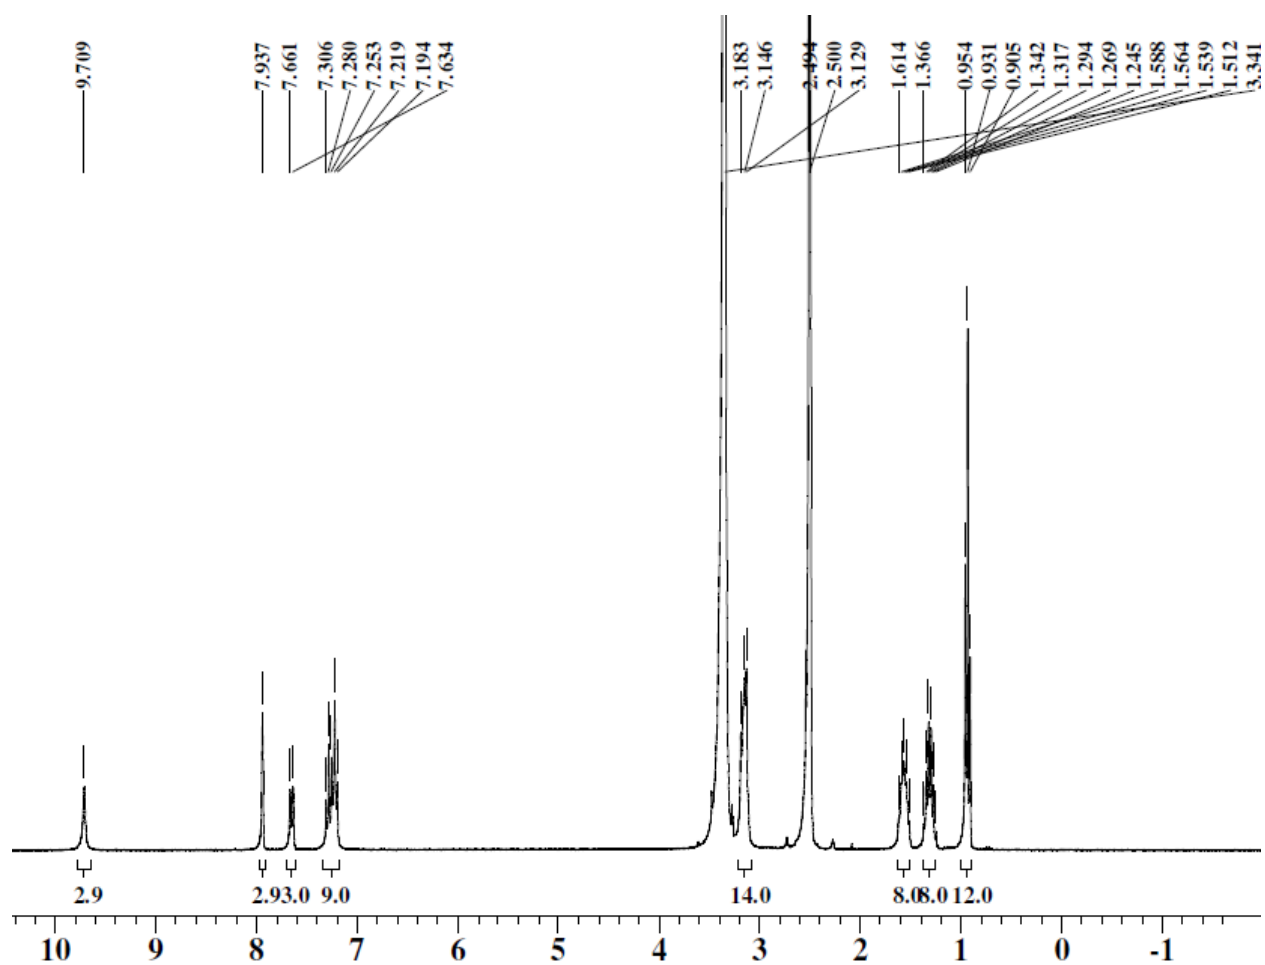

**Figure 4S.**  $^1\text{H-NMR}$  spectra of C1 in  $\text{DMSO-}d_6$  at 298K.

5

10

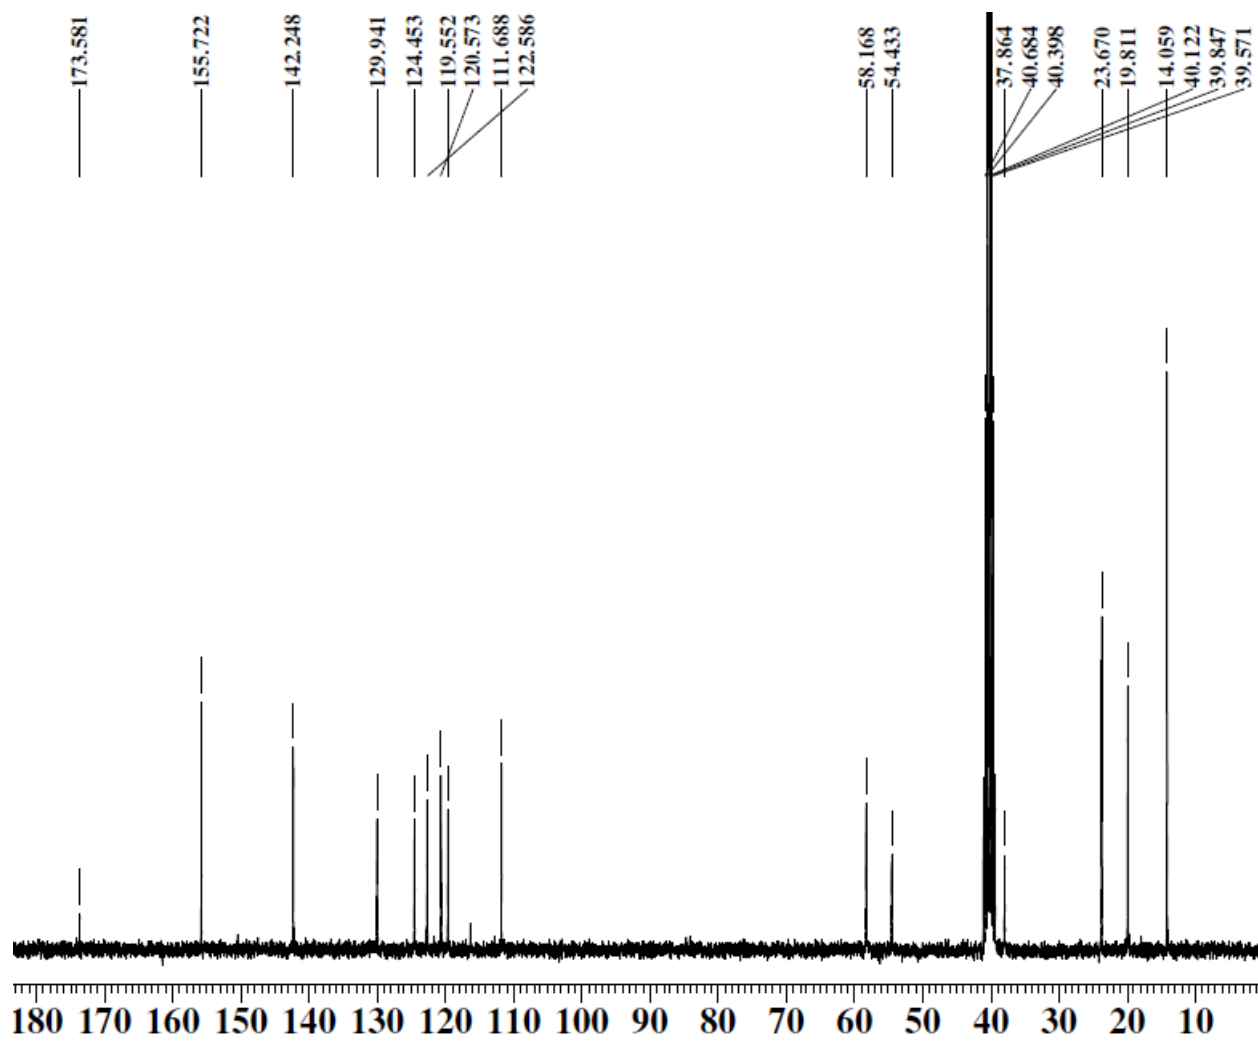

**Figure 5S.**  $^{13}\text{C}$ -NMR spectra of **C1** in  $\text{DMSO-}d_6$  at 298K.

5

10

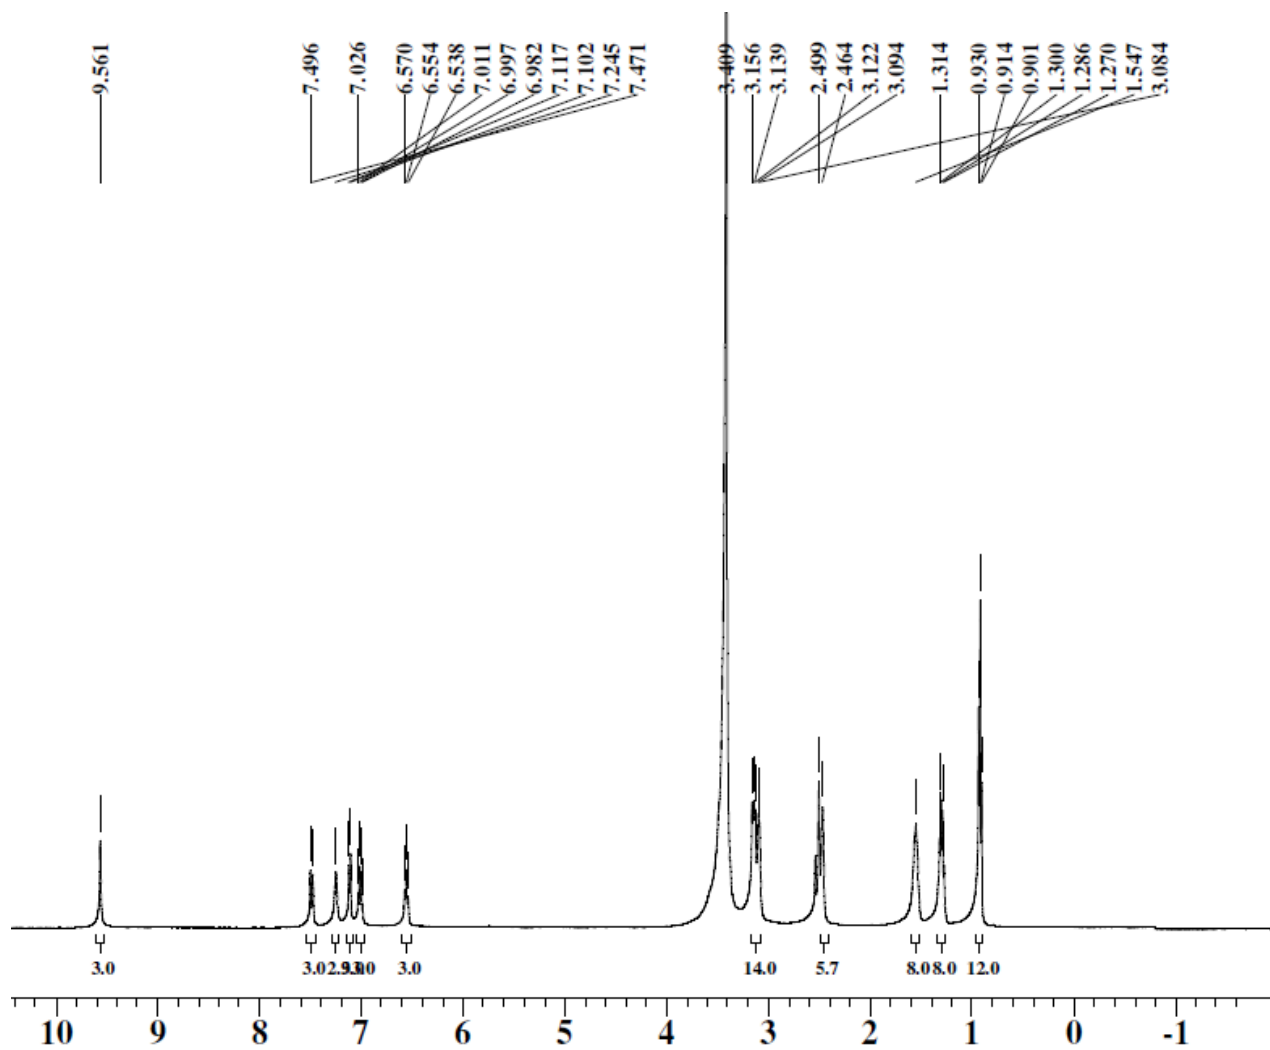

**Figure 6S.** <sup>1</sup>H-NMR spectra of C2 in DMSO-*d*<sub>6</sub> at 298K.

5

10

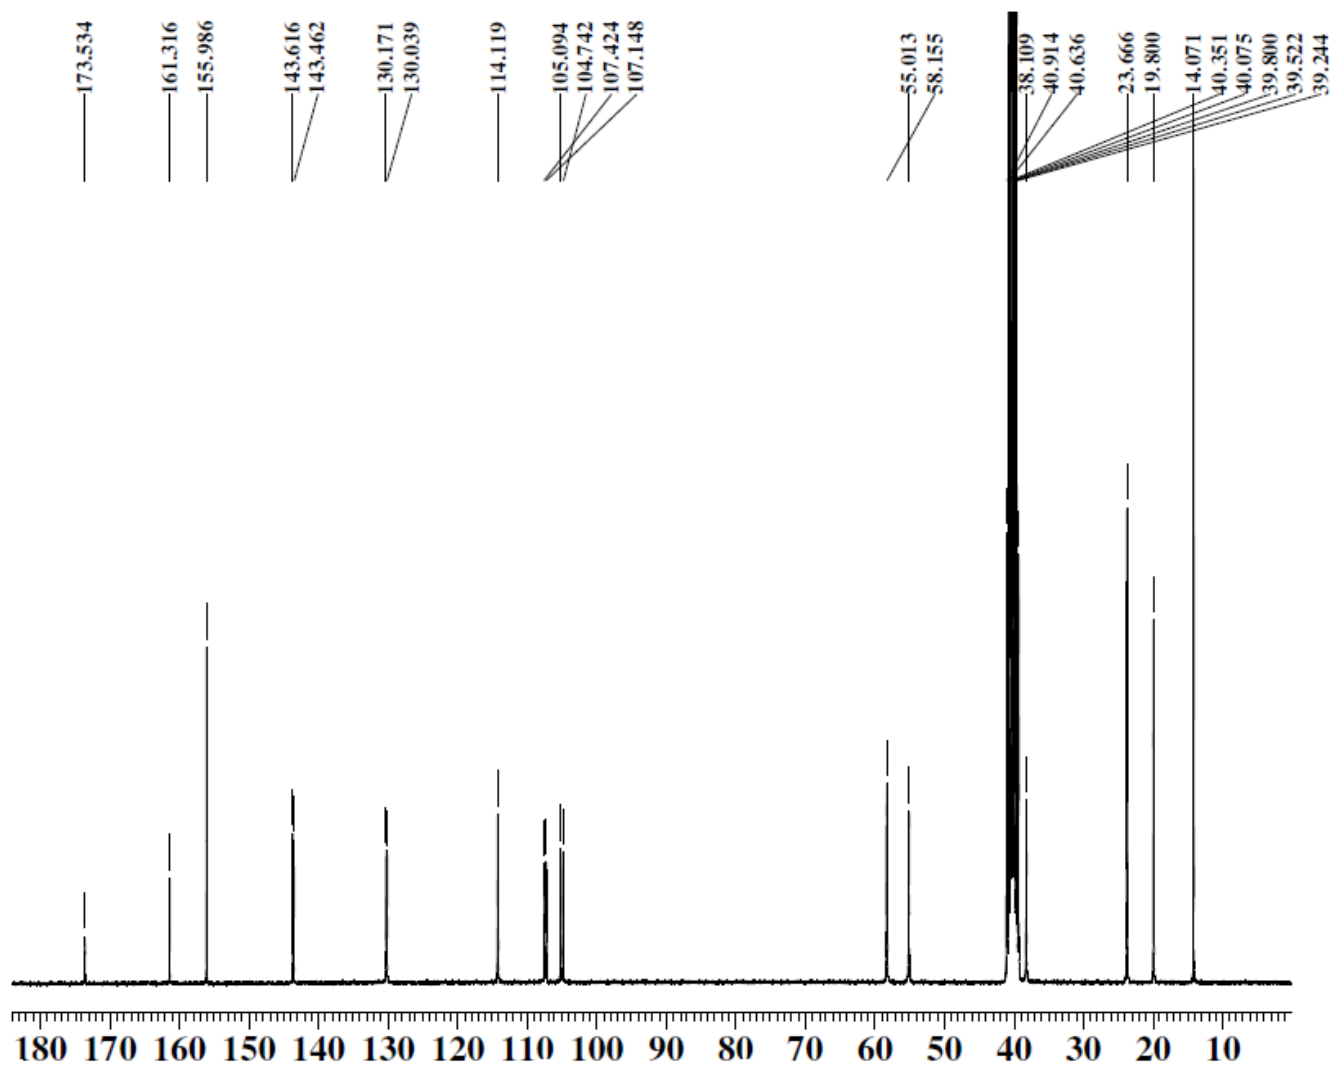

**Figure 7S.**  $^{13}\text{C}$ -NMR spectra of **C2** in  $\text{DMSO-}d_6$  at 298K.

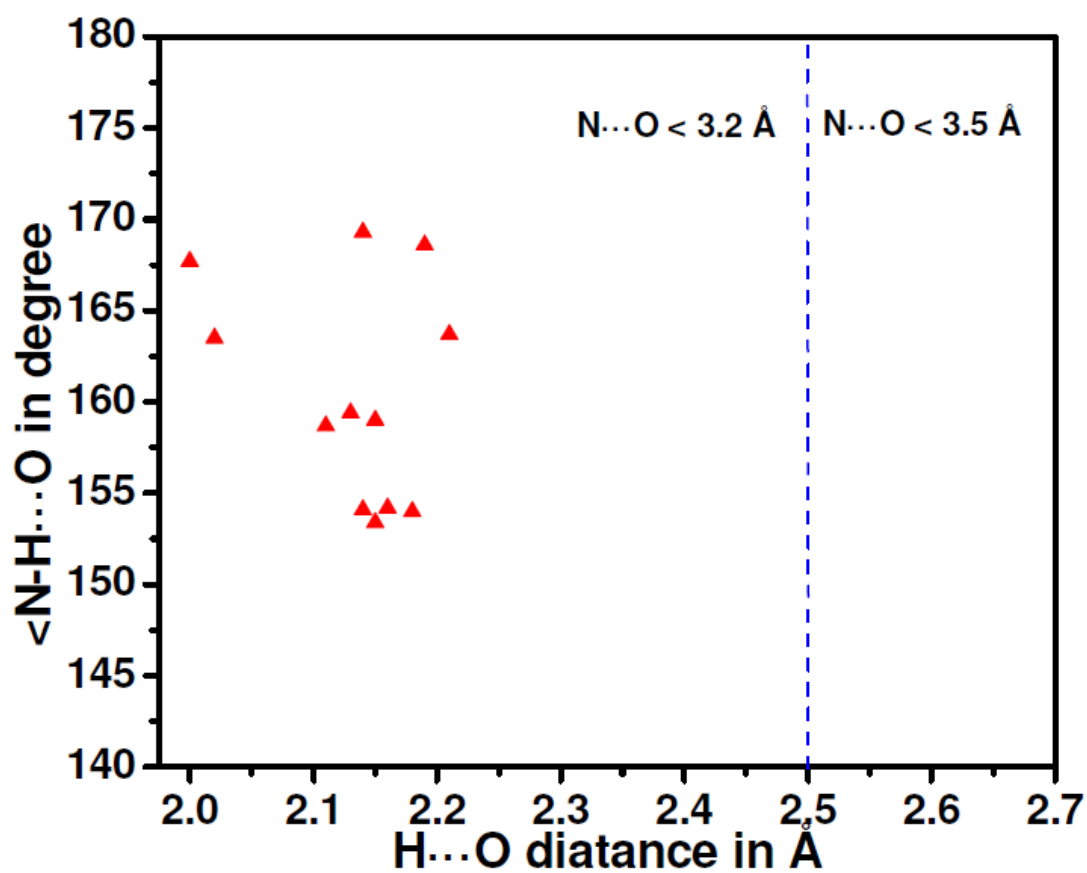

5

**Figure 8S.** The scatter plot of N-H...O vs. H...O distances of the hydrogen bonds in **C1**.

5

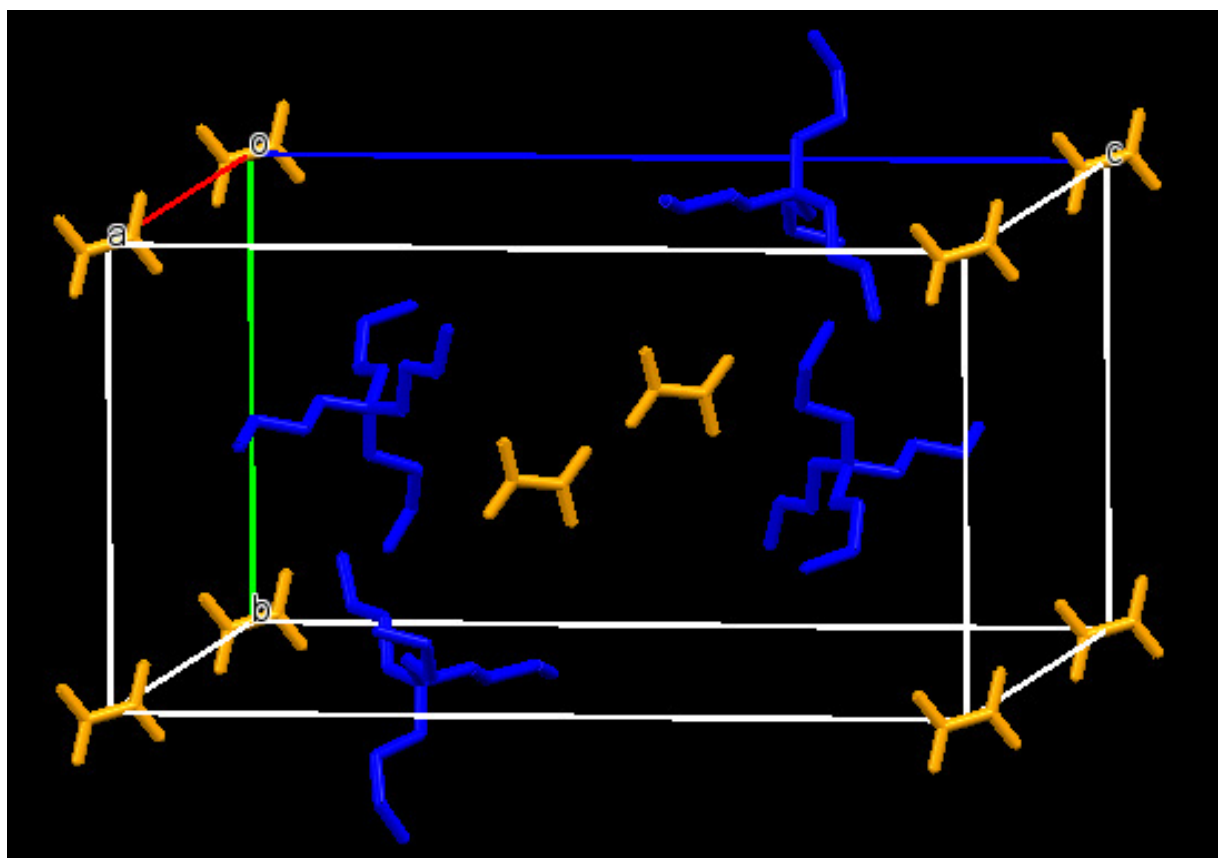

10 **Figure 9S.** Crystal packing of oxalate and tetrabutylammonium counter cations in the unit cell of **C2**.

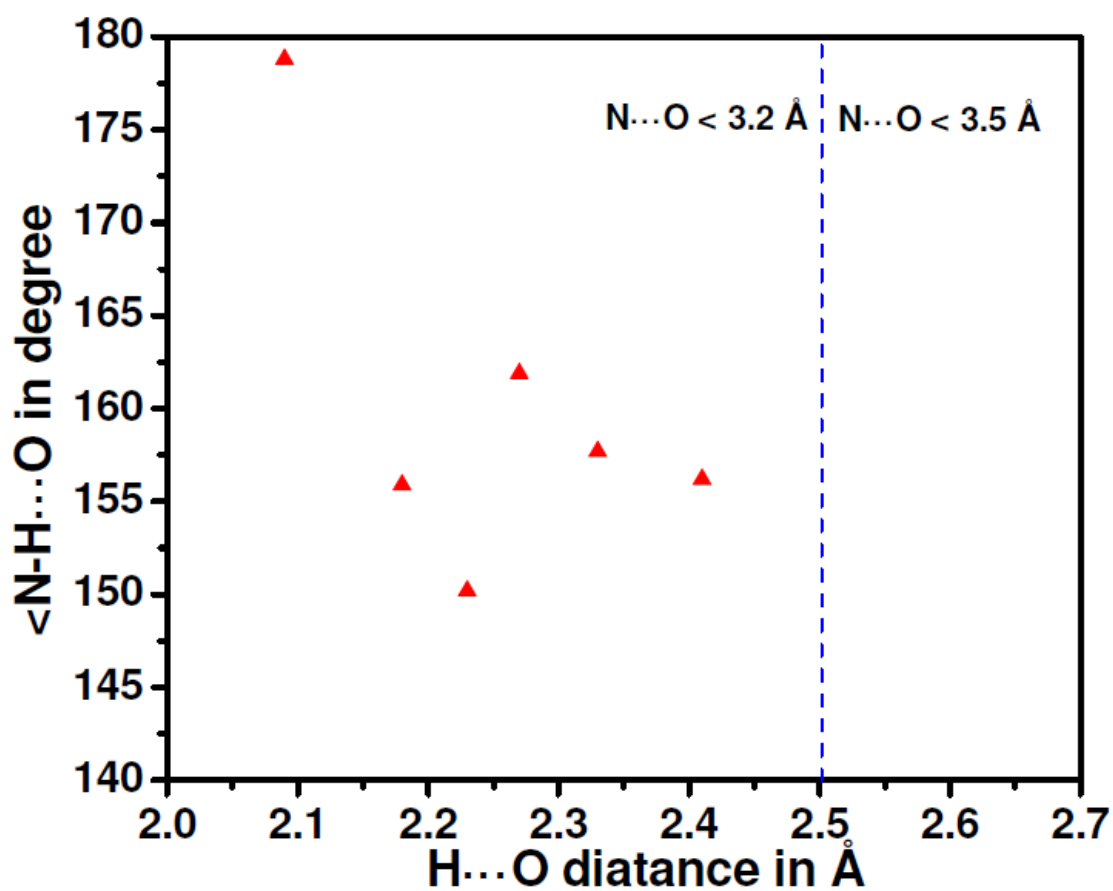

5

**Figure 10S.** The scatter plot of N–H...O vs. H...O distances of the hydrogen bonds in C2.

10



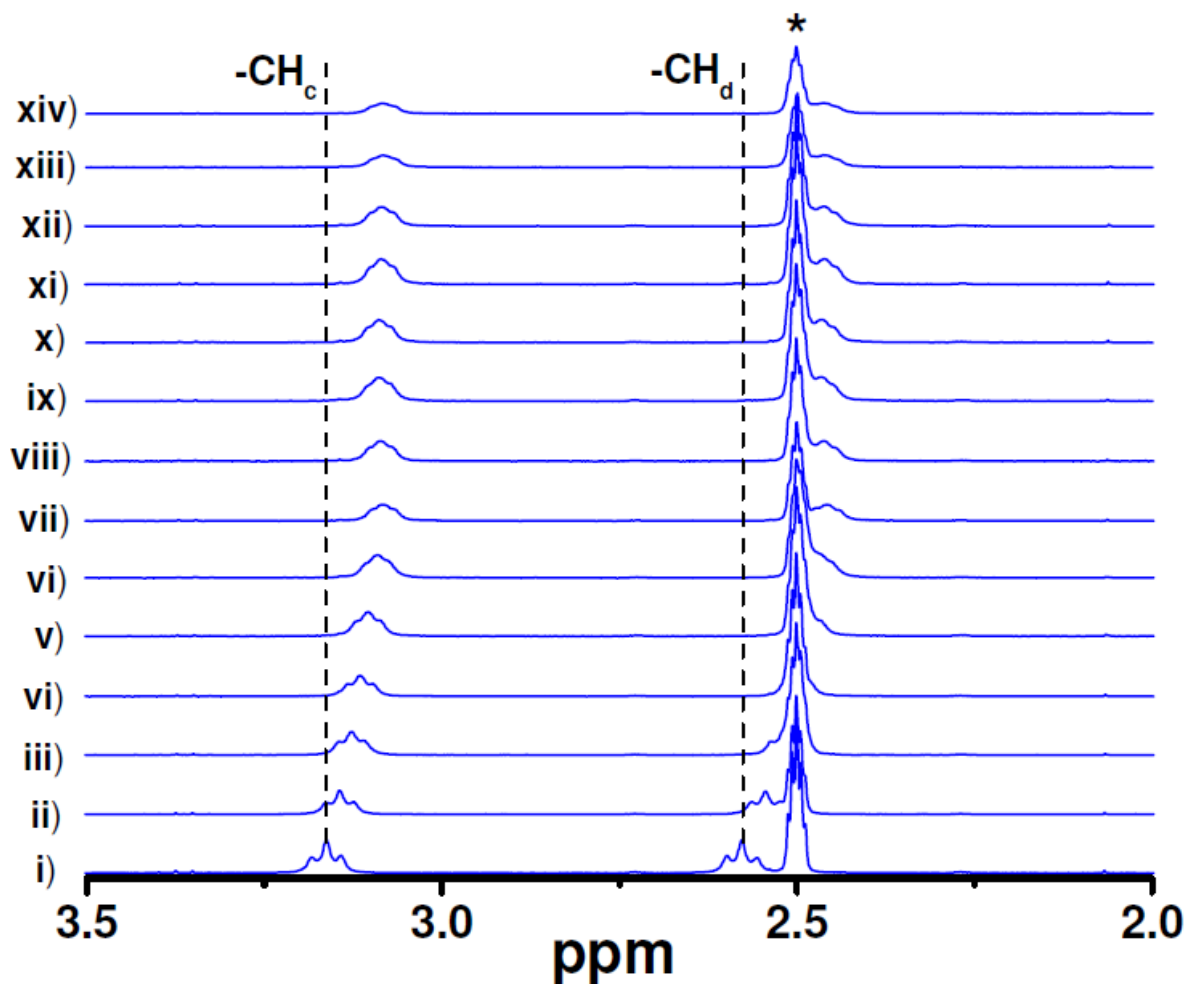

**Figure 11S.** a) Partial  $^1\text{H-NMR}$  (300 MHz) spectral changes of **L1** in  $\text{D}_2\text{O}:\text{DMSO-}d_6$  (1:9, v/v) with added standard  $\text{K}_2\text{C}_2\text{O}_4$  solution in  $\text{D}_2\text{O}:\text{DMSO-}d_6$  (1.1:1, v/v) (298 K) ( $[\text{L1}]_0 = 4.94$  mM). Ratio of concentration  $[\text{C}_2\text{O}_4^{2-}]/[\text{L1}]$ : (i) 0, (ii) 0.129, (iii) 0.258, (iv) 0.387, (v) 0.517, (vi) 0.646, (vii) 0.775, (viii) 0.904, (ix) 1.033, (x) 1.162, (xi) 1.421, (xii) 1.938, (xiii) 2.584 and (xiv) 2.971 ( $[\text{L1}]$  is varied from 4.94 to 3.61 mM by the addition of aliquots of 39.91 mM  $\text{K}_2\text{C}_2\text{O}_4$ ) (\* indicates the  $\text{DMSO-}d_6$  solvent peak).

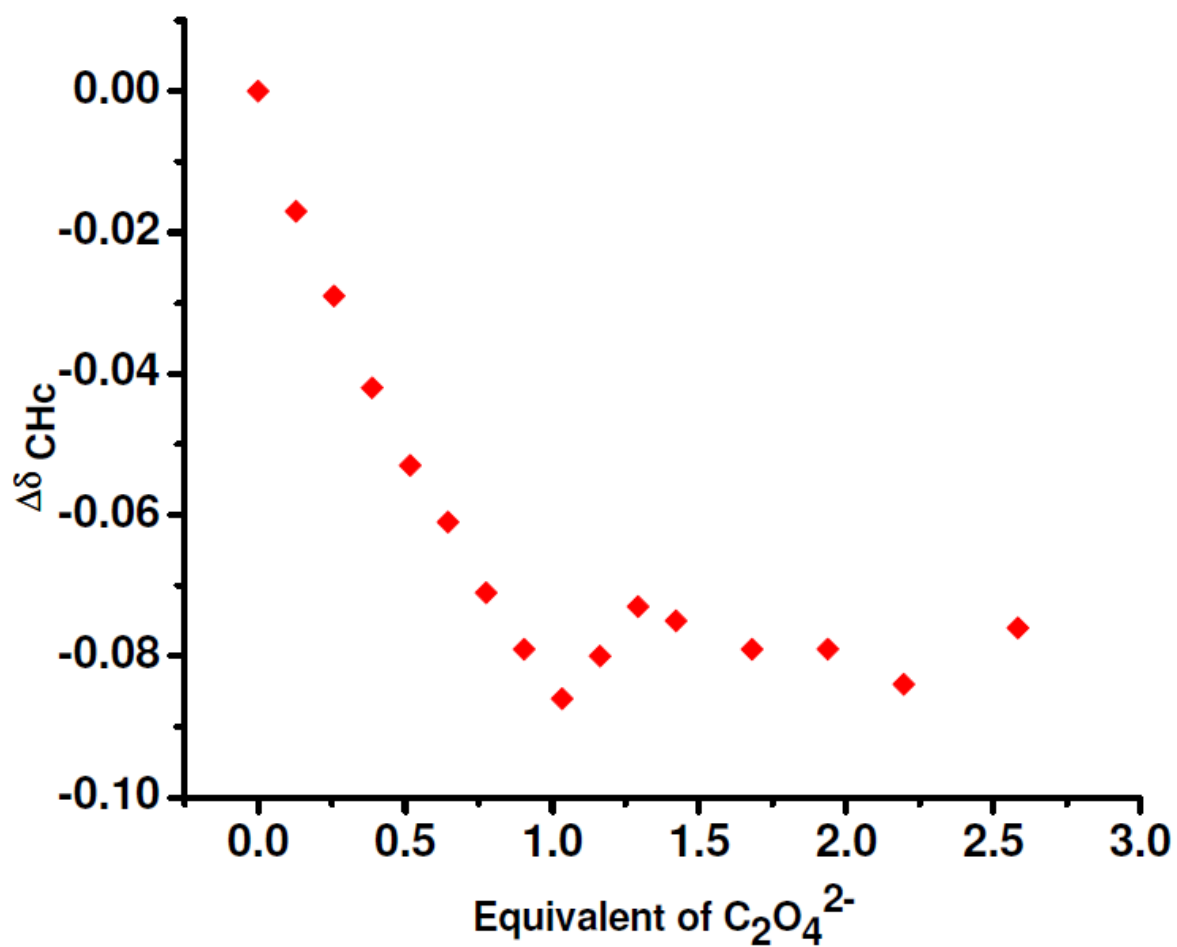

**Figure 12S.** Plot shows the change in chemical shift of the  $-CH_c$  of **L1** with increasing amounts of standard  $K_2C_2O_4$  solution at 298K.

5

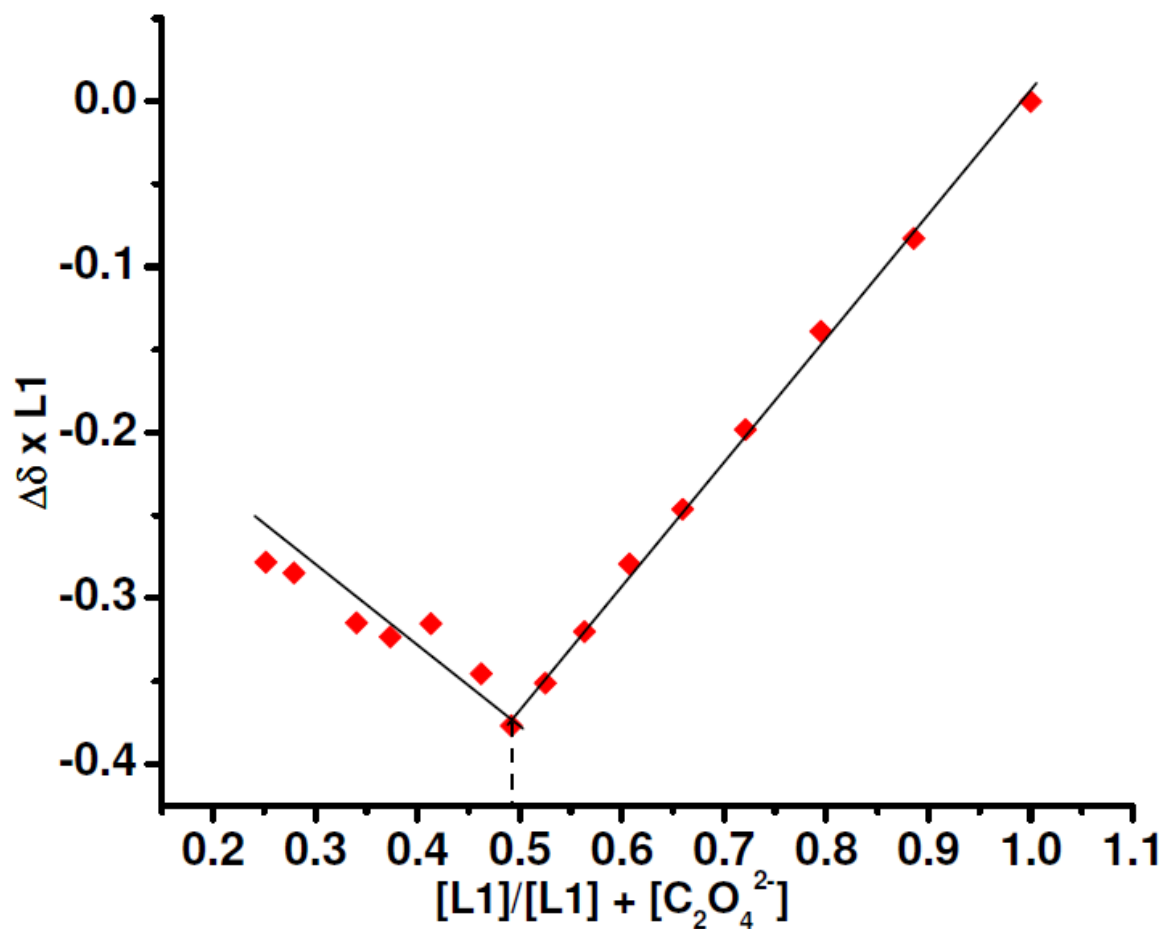

**Figure 13S.** Job's Plot of L1 with  $K_2C_2O_4$  in DMSO- $d_6$ / $D_2O$  (1:1.1)(v/v) at 298K.

10

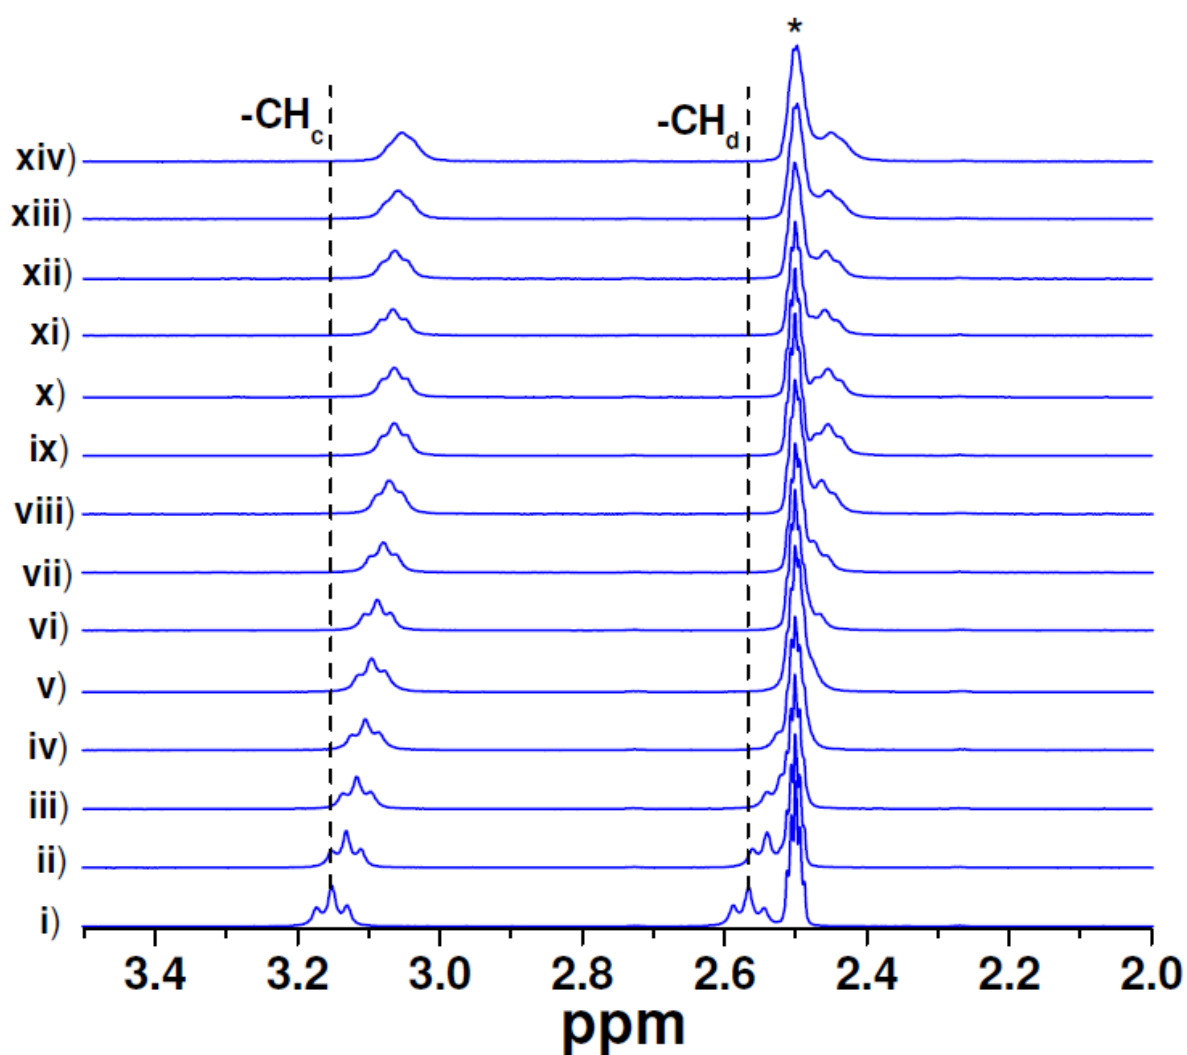

5

**Figure 14S.** (a) Partial <sup>1</sup>H-NMR (300 MHz) spectral changes of **L2** in DMSO-*d*<sub>6</sub> with added standard K<sub>2</sub>C<sub>2</sub>O<sub>4</sub> solution in DMSO-*d*<sub>6</sub>/D<sub>2</sub>O (1:1.1) (298 K) ([**L2**]<sub>0</sub> = 4.77 mM). Ratio of concentration [C<sub>2</sub>O<sub>4</sub><sup>2-</sup>]/[**L2**]: (i) 0, (ii) 0.122, (iii) 0.245, (iv) 0.367, (v) 0.490, (vi) 0.612, (vii) 0.734, (viii) 0.857, (ix) 0.979, (x) 1.012, (xi) 1.350, (xii) 1.714, (xiii) 2.203 and (xiv) 3.091 ([**L1**] is varied from 4.77 to 3.39 mM by the addition of aliquots of 36.49 mM K<sub>2</sub>C<sub>2</sub>O<sub>4</sub>) (\* indicates the DMSO-*d*<sub>6</sub> solvent peak).

15

5

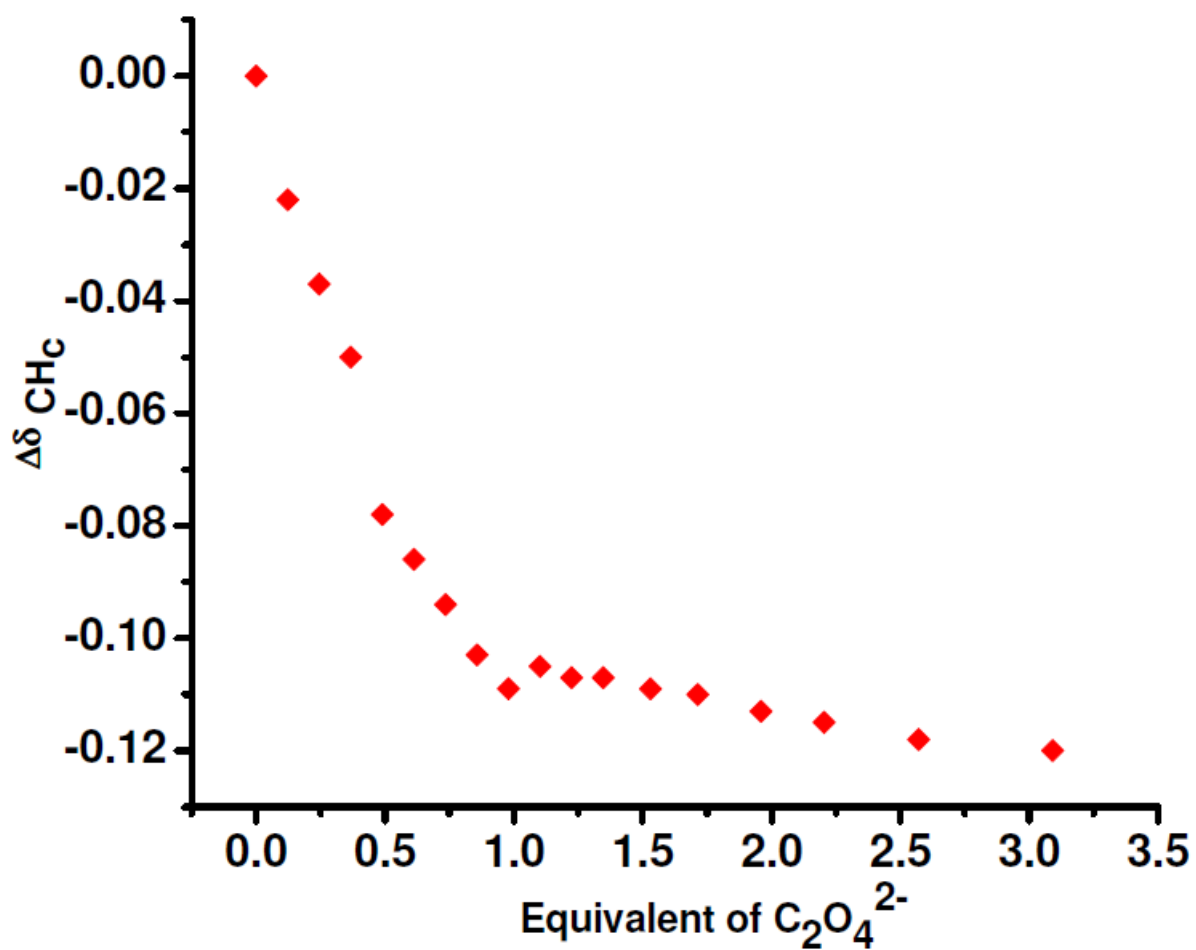

10 **Figure 15S.** Plot shows the change in chemical shift of the  $-CH_c$  of L2 with increasing amounts of standard  $K_2C_2O_4$  solution at 298K.

15

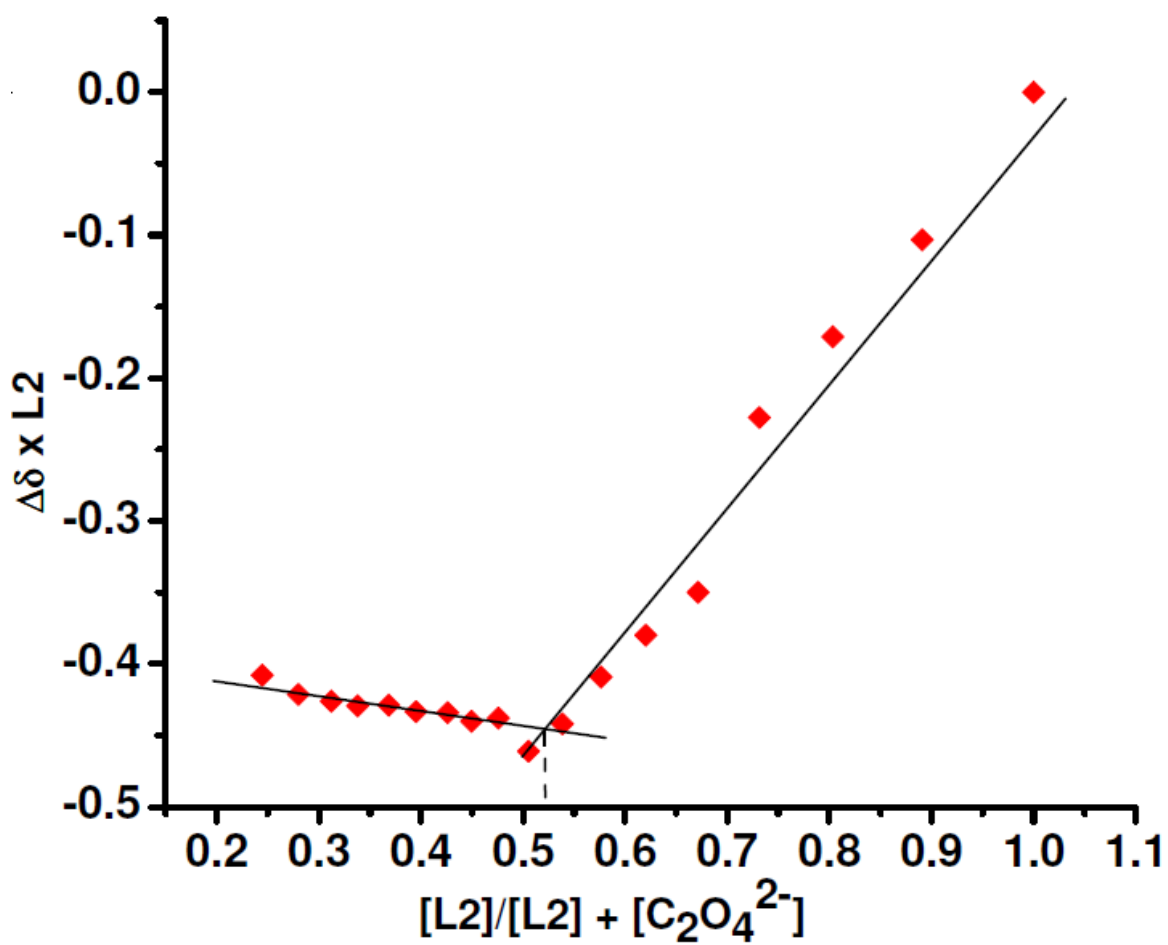

5

**Figure 16S.** Job's Plot of **L2** with  $K_2C_2O_4$  in  $DMSO-d_6/D_2O$  (1:1.1)(v/v) at 298K.

5

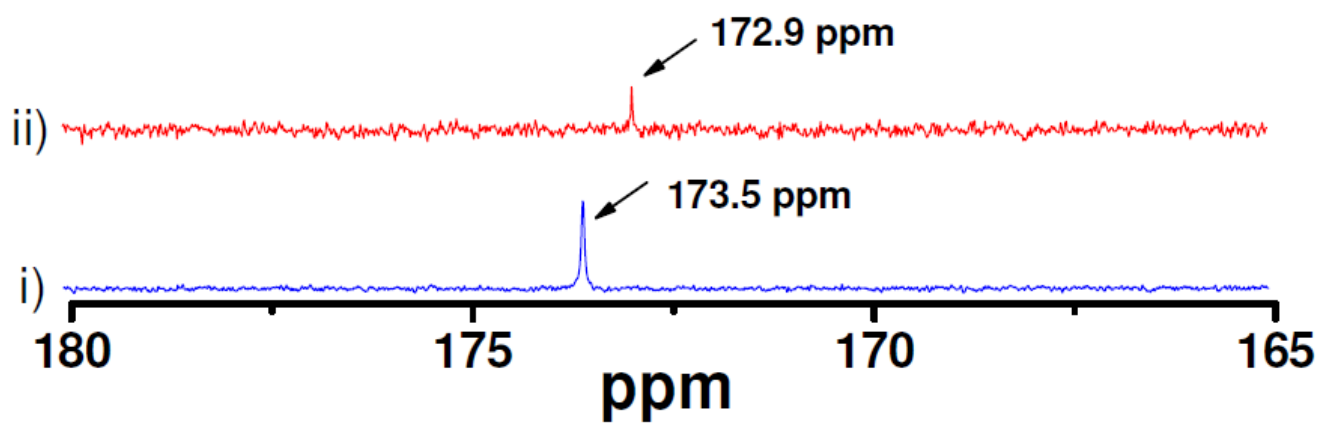

10 **Figure 17S.** Different peak positions of oxalate carbon observed in partial  $^{13}\text{C}$  NMR spectra of (i) **C1** and (ii) **C2** respectively.

15

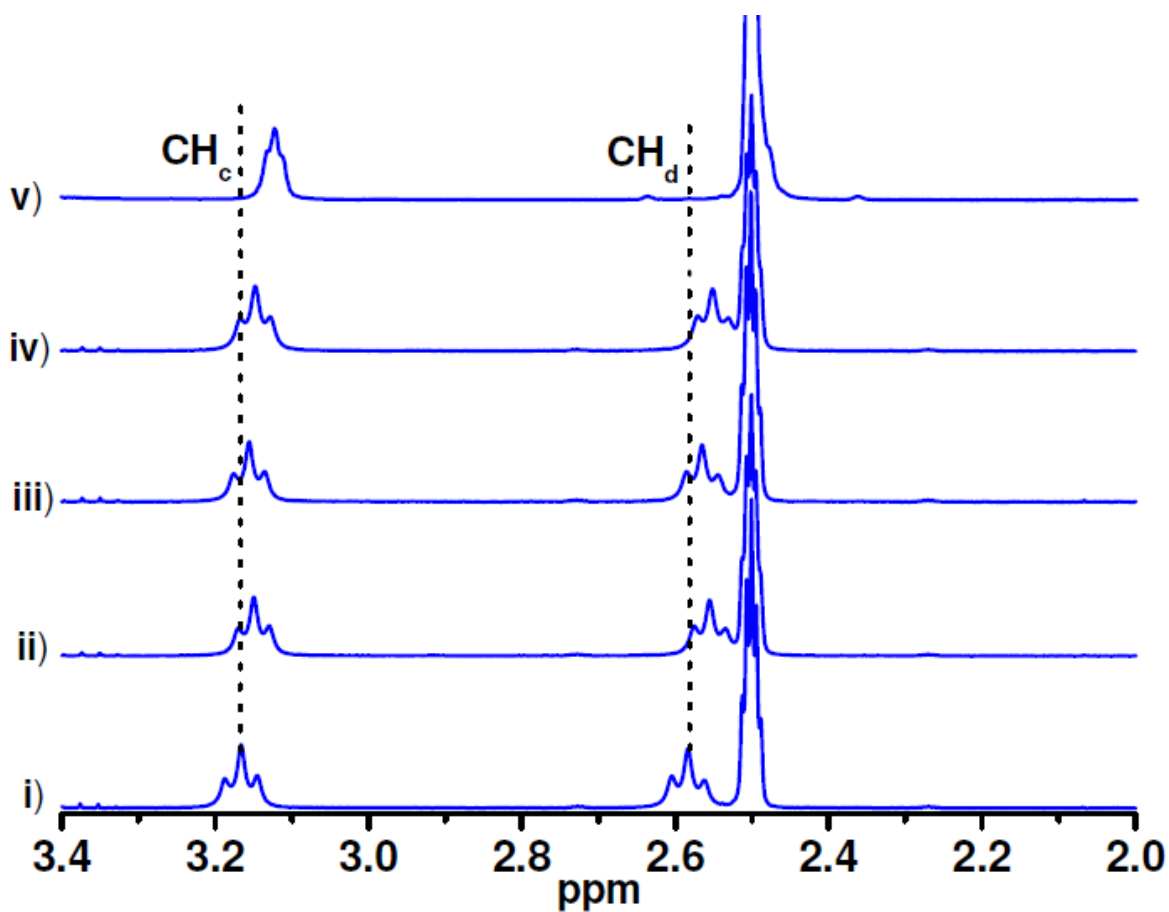

5

**Figure 18S.** a) Partial <sup>1</sup>H-NMR (300 MHz) spectral changes of **L1** i) in D<sub>2</sub>O:DMSO-*d*<sub>6</sub> (1:9, v/v) with added standard 2 equivalents of ii) NaOAc; iii) NaOBz; iv) Na<sub>2</sub>(terephthalate) and v) K<sub>2</sub>C<sub>2</sub>O<sub>4</sub> solution in D<sub>2</sub>O: DMSO-*d*<sub>6</sub> 10 (1.1:1, v/v) (298 K).



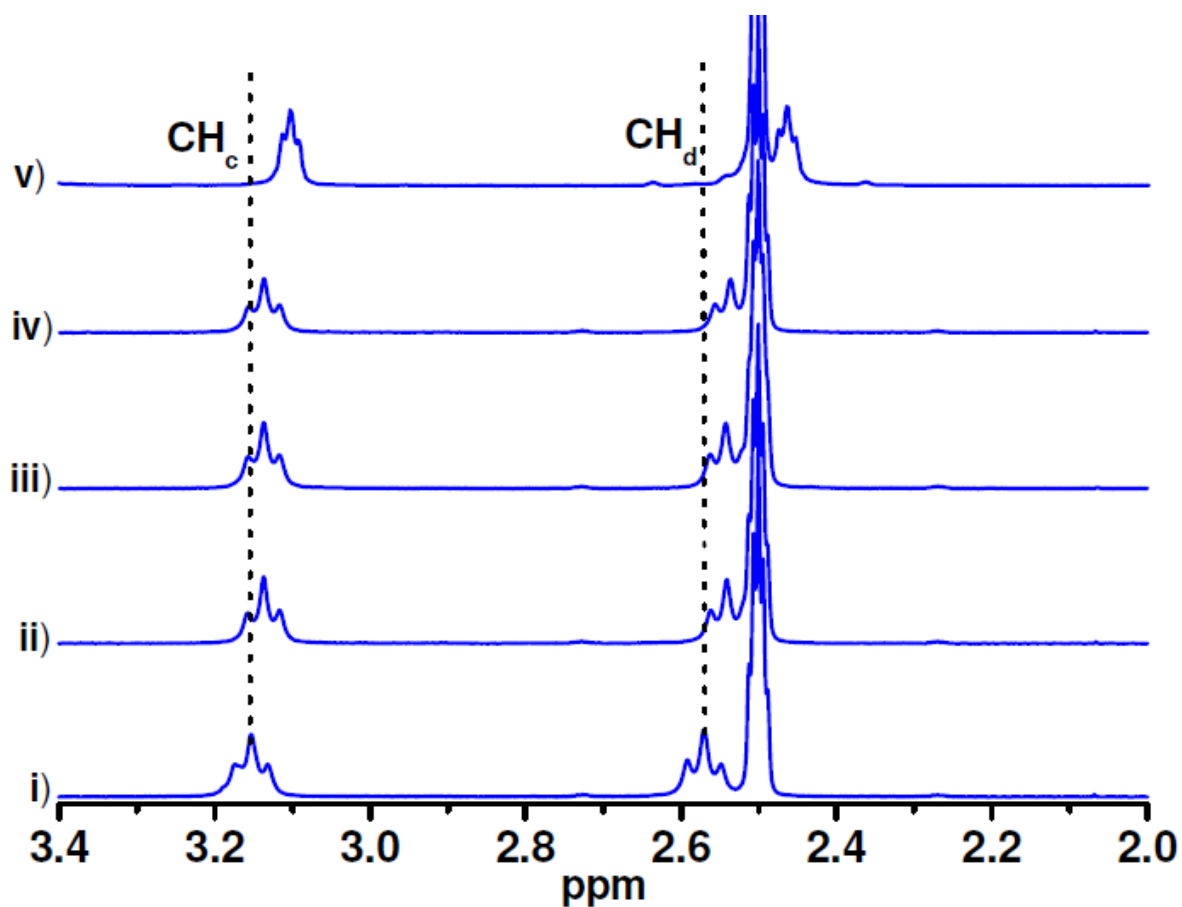

5

**Figure 19S.** a) Partial  $^1\text{H-NMR}$  (300 MHz) spectral changes of **L2** i) in  $\text{D}_2\text{O}:\text{DMSO-}d_6$  (1:9,v/v) with added standard 2 equivalents of ii) NaOAc; iii) NaOBz; iv)  $\text{Na}_2(\text{terephthalate})$  and v)  $\text{K}_2\text{C}_2\text{O}_4$  solution in  $\text{D}_2\text{O}:\text{DMSO-}d_6$  (1.1:1, v/v) (298 K).

10

**Table 1S.** Crystallographic parameters of **C1** and **C2**.

| Parameters                             | <b>C1</b>                                                        | <b>C2</b>                                                                    |
|----------------------------------------|------------------------------------------------------------------|------------------------------------------------------------------------------|
| CCDC Number                            | 914147                                                           | 914149                                                                       |
| Molecular formula                      | C <sub>94</sub> H <sub>132</sub> N <sub>22</sub> O <sub>10</sub> | C <sub>44</sub> H <sub>65</sub> F <sub>4</sub> N <sub>8</sub> O <sub>5</sub> |
| Formula weight                         | 1730.22                                                          | 862.04                                                                       |
| Crystal system                         | Triclinic                                                        | Monoclinic                                                                   |
| Space group                            | P-1                                                              | P2(1)/c                                                                      |
| a (Å)                                  | 12.541(3)                                                        | 13.761(5)                                                                    |
| b (Å)                                  | 13.299(3)                                                        | 14.036(5)                                                                    |
| c (Å)                                  | 33.259(9)                                                        | 25.220(9)                                                                    |
| α (°)                                  | 91.050(7)                                                        | 90.00                                                                        |
| β (°)                                  | 93.994(7)                                                        | 103.680(10)                                                                  |
| γ (°)                                  | 117.167(7)                                                       | 90.00                                                                        |
| V (Å <sup>3</sup> )                    | 4915(2)                                                          | 4733(3)                                                                      |
| Z                                      | 2                                                                | 4                                                                            |
| d <sub>calc</sub> (g/cm <sup>3</sup> ) | 1.169                                                            | 1.210                                                                        |
| Crystal size (mm <sup>3</sup> )        | 0.60 x 0.30 x 0.26                                               | 0.40 x 0.30 x 0.20                                                           |
| F(000)                                 | 1860                                                             | 1844                                                                         |
| μ Mo Kα (mm <sup>-1</sup> )            | 0.078                                                            | 0.091                                                                        |
| T(K)                                   | 100(2)                                                           | 100(2)                                                                       |
| θ range (deg)                          | 1.72-25.00                                                       | 1.52-25.00                                                                   |
| Reflections collected                  | 53158                                                            | 32998                                                                        |
| Independent reflections                | 16958                                                            | 8333                                                                         |
| Parameters                             | 1143                                                             | 554                                                                          |
| R <sub>1</sub> ;wR <sub>2</sub>        | 0.0965; 0.2751                                                   | 0.0783; 0.2411                                                               |
| GOF (F <sup>2</sup> )                  | 1.149                                                            | 1.063                                                                        |

**Table 2S.** Interatomic distances, and angles for the H-bonding Interactions of the encapsulated  $C_2O_4^{2-}$  in **C1**.

| D-H...A                    | d (H...A), Å | d (D...A), Å | < D-H-A ° |
|----------------------------|--------------|--------------|-----------|
| N2-H2...O9 <sup>a</sup>    | 2.210        | 3.045(6)     | 163.7     |
| N3-H3...O10 <sup>a</sup>   | 2.000        | 2.843(5)     | 167.7     |
| N5-H5...O9 <sup>a</sup>    | 2.140        | 2.942(5)     | 154.1     |
| N6-H6...O9 <sup>a</sup>    | 2.150        | 2.945(4)     | 153.4     |
| N8-H8...O10 <sup>a</sup>   | 2.140        | 2.988(5)     | 169.3     |
| N9-H9...O8 <sup>a</sup>    | 2.130        | 2.953(5)     | 159.4     |
| N12-H12...O7 <sup>a</sup>  | 2.190        | 3.033(6)     | 168.6     |
| N13-H13...O8 <sup>a</sup>  | 2.020        | 2.855(6)     | 163.5     |
| N15-H15...O7 <sup>a</sup>  | 2.160        | 2.958(6)     | 154.2     |
| N16-H16...O7 <sup>a</sup>  | 2.180        | 2.973(5)     | 154.0     |
| N18-H18...O8 <sup>a</sup>  | 2.150        | 2.969(5)     | 159.0     |
| N19-H19...O10 <sup>a</sup> | 2.110        | 2.930(4)     | 158.7     |

<sup>a</sup> x, y, z

**Table 3S.** Interatomic distances, and angles for the H-bonding Interactions of the encapsulated  $C_2O_4^{2-}$  in **C2**.

| D-H...A                 | d (H...A), Å | d (D...A), Å | < D-H-A ° |
|-------------------------|--------------|--------------|-----------|
| N2-H2...O4 <sup>a</sup> | 2.230        | 3.006(3)     | 150.2     |
| N3-H3...O5 <sup>a</sup> | 2.180        | 2.983(3)     | 155.9     |
| N4-H4...O4 <sup>a</sup> | 2.270        | 3.095(4)     | 161.9     |
| N5-H5...O4 <sup>a</sup> | 2.410        | 3.216(4)     | 156.2     |
| N6-H6...O4 <sup>a</sup> | 2.090        | 2.954(4)     | 178.8     |
| N7-H7...O5 <sup>a</sup> | 2.330        | 3.142(4)     | 157.7     |

<sup>a</sup> x, y, z

## References

- (1) Custelcean, R.; Moyer, B. A.; Hay, B. P. *Chem. Commun.* **2005**, 5971.
- (2) SAINT and XPREP, 5.1 ed.; Siemens Industrial Automation Inc.: Madison, WI, **1995**, Sheldrick, G. M.
- (3) SADABS, *empirical absorption Correction Program*; University of Göttingen: Göttingen, Germany, **1997**.
- (4) Sheldrick, G. M. *SHELXTL Reference Manual: Version 5.1*; Bruker AXS: Madison, WI, **1997**.
- (5) Sheldrick, G. M. *SHELXL-97: Program for Crystal Structure Refinement*; University of Göttingen: Göttingen, Germany, **1997**.
- (6) Spek, A. L. *PLATON-97*; University of Utrecht: Utrecht, The Netherlands, **1997**.
- (7) Mercury 2.3 Supplied with Cambridge Structural Database; CCDC: Cambridge, U.K., **2003-2004**.
- (8) Hynes, M. J. *J. Chem. Soc., Dalton Trans.* **1993**, 311.
